# Supplementary material
Source: publisher figshare collection journal article supplement (https://acs.figshare.com/ndownloader/files/30598980)
Supplement: Supplementary file 1 [file 30598980]

# Supporting Information

## **Functional Nanomaterials and 3D-printable Nanocomposite Hydrogels for Enhanced Cell Proliferation and for the Reduction of Bacterial Biofilm Formation**

*Andisheh Motealleh,<sup>1</sup> Didem Kart,<sup>2</sup> Michael Czieborowski,<sup>1</sup> and Nermin S. Kehr<sup>\*1</sup>*

<sup>1</sup>Dr. N. S. Kehr, Dr. A. Motealleh, and M. Czieborowski

Physikalisches Institute and Center for Soft Nanoscience, Westfälische Wilhelms-Universität  
Münster, Busso-Peus-Strasse 10, 48149 Münster, Germany

E-mail: seda@uni.muenster.de

<sup>2</sup>Dr. Didem Kart

Department of Pharmaceutical Microbiology, Hacettepe University Faculty of Pharmacy,  
06100 Sıhhiye, Ankara, Turkey

**Determination of the swelling ratio of AlgL, AlgL-PMO-OH, AlgL-PMO-PDL, AlgL-TetPMO-OH, and AlgL-TetPMO-PDL scaffolds:** The weight of dried scaffolds was first measured then they were immersed in cell culture media for 1 day, 4 and 7 days at physiological temperature (37 °C). The swollen scaffolds were removed from cell culture media and weighed again. The swelling ratio (SR) was calculated using the following equation:

$$SR = (W_s - W_d) / W_d$$

where  $W_s$  is the mass of the swollen scaffolds and  $W_d$  is their dry mass; all experiments were carried out in triplicate.

**Degradation behavior of AlgL, AlgL-PMO-OH, AlgL-PMO-PDL, AlgL-TetPMO-OH, and AlgL-TetPMO-PDL scaffolds:** Each scaffold (in the presence and absence of cells) was covered with cell culture media (2 ml) and incubated for 1 day, 4 and 7 days at 37 °C. After each incubation time, the samples were taken out and dried at 37 °C. The degradation behavior [weight loss (%)] was found by measuring the weight of the samples before and after immersing them in cell culture media according to the following equation:

$$W_{\text{loss}} (\%) = [(W_1 - W_2) / W_1] * 100$$

where  $W_1$  and  $W_2$  indicate the weight before and after degradation, respectively.

**Rheological measurements:** Rheological measurements were done using an MCR 302 rheometer (Anton Paar, Ashland, VA, USA) with a 25 mm diameter parallel-plate geometry measuring system. Storage modulus ( $G'$ ), loss modulus ( $G''$ ) and complex viscosity ( $|\eta^*|$ ) were measured from an amplitude sweep of AlgL, AlgL-PMO-OH, AlgL-PMO-PDL, AlgL-TetPMO-OH, and AlgL-TetPMO-PDL hydrogels in a linear viscoelastic range at a frequency range from 0.01 to 100 Hz. The measured viscosity curves were obtained from the rotational test, which was performed at shear rates ranging from 1 to 10  $s^{-1}$ . In our study, a 25 °C temperature was defined for all experiments.

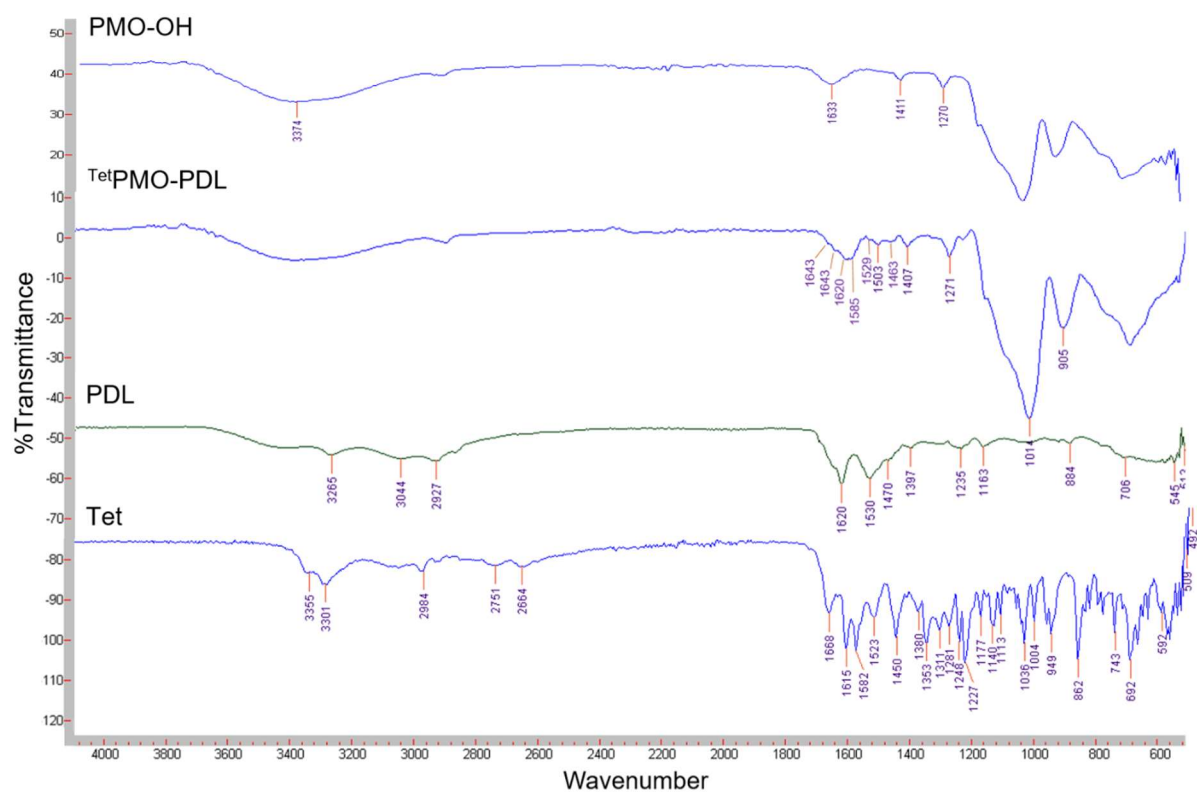

**Figure S1.** The IR spectra of PMO-OH, <sup>Tet</sup>PMO-PDL, PDL, and Tet.

**Table S1.** The DLS and zeta potential of PMO-OH, PMO-PDL, <sup>Tet</sup>PMO-OH, and <sup>Tet</sup>PMO-PDL.

|                     | PMO-OH      | PMO-PDL      | <sup>Tet</sup> PMO-OH | <sup>Tet</sup> PMO-PDL |
|---------------------|-------------|--------------|-----------------------|------------------------|
| DLS (nm)            | 250.9 ± 7.2 | 610.9 ± 42.3 | 374.8 ± 33.0          | 622.1 ± 33.2           |
| Zeta potential (mV) | -25.9 ± 0.4 | 33.8 ± 0.4   | -26.6 ± 0.7           | 35.0 ± 1.2             |

**Table S2.** The amount of PDL and Tet on PMO nanomaterials.

|             | <sup>Tet</sup> PMO-OH | <sup>Tet</sup> PMO-PDL | PMO-PDL   |
|-------------|-----------------------|------------------------|-----------|
| PDL (μg/mg) |                       | 4.2 ± 0.2              | 3.9 ± 0.3 |
| Tet (μg/mg) | 264.0 ± 15.6          | 238.6 ± 9.1            |           |

**Table S3.** Swelling ratio of scaffolds.

|            | AlgL       | AlgL-<br>PMO-OH | AlgL-<br>PMO-PDL | AlgL-<br>TetPMO-OH | AlgL-<br>TetPMO-PDL |
|------------|------------|-----------------|------------------|--------------------|---------------------|
| <b>1 d</b> | 22.5 ± 2.5 | 24.3 ± 2.1      | 26.1 ± 2.5       | 23.9 ± 1.8         | 25.8 ± 2.1          |
| <b>4 d</b> | 22.8 ± 2.2 | 24.9 ± 2.4      | 26.6 ± 2.4       | 24.1 ± 2.0         | 26.0 ± 2.1          |
| <b>7 d</b> | 22.7 ± 2.1 | 24.8 ± 2.4      | 26.5 ± 2.4       | 24.0 ± 2.0         | 25.9 ± 2.1          |

**Table S4.** Weight loss (%) of scaffolds.

| without<br>cells | AlgL       | AlgL-<br>PMO-OH    | AlgL-PMO-<br>PDL    | AlgL-<br>TetPMO-OH    | AlgL-<br>TetPMO-PDL    |
|------------------|------------|--------------------|---------------------|-----------------------|------------------------|
| 1d               | 0.4 ± 0.1  | 0.2 ± 0.04         | 0.1 ± 0.04          | 0.2 ± 0.1             | 0.1 ± 0.1              |
| 4d               | 2.5 ± 1.1  | 0.8 ± 0.2          | 0.5 ± 0.1           | 0.8 ± 0.1             | 0.4 ± 0.1              |
| 7d               | 4.0 ± 0.5  | 1.8 ± 0.6          | 1.1 ± 0.2           | 1.7 ± 0.3             | 1.1 ± 0.3              |
| with cells       | Alg-Lap    | Alg-Lap-<br>PMO-OH | Alg-Lap-<br>PMO-PDL | Alg-Lap-<br>TetPMO-OH | Alg-Lap-<br>TetPMO-PDL |
| 1d               | 8.0 ± 0.9  | 5.5 ± 1.0          | 4.9 ± 0.6           | 5.4 ± 1.2             | 4.7 ± 1.9              |
| 4d               | 10.0 ± 1.9 | 7.0 ± 1.1          | 6.3 ± 0.7           | 6.7 ± 1.5             | 6.2 ± 1.4              |
| 7d               | 11.4 ± 2.7 | 7.4 ± 1.6          | 6.8 ± 1.6           | 7.2 ± 0.8             | 6.6 ± 1.2              |

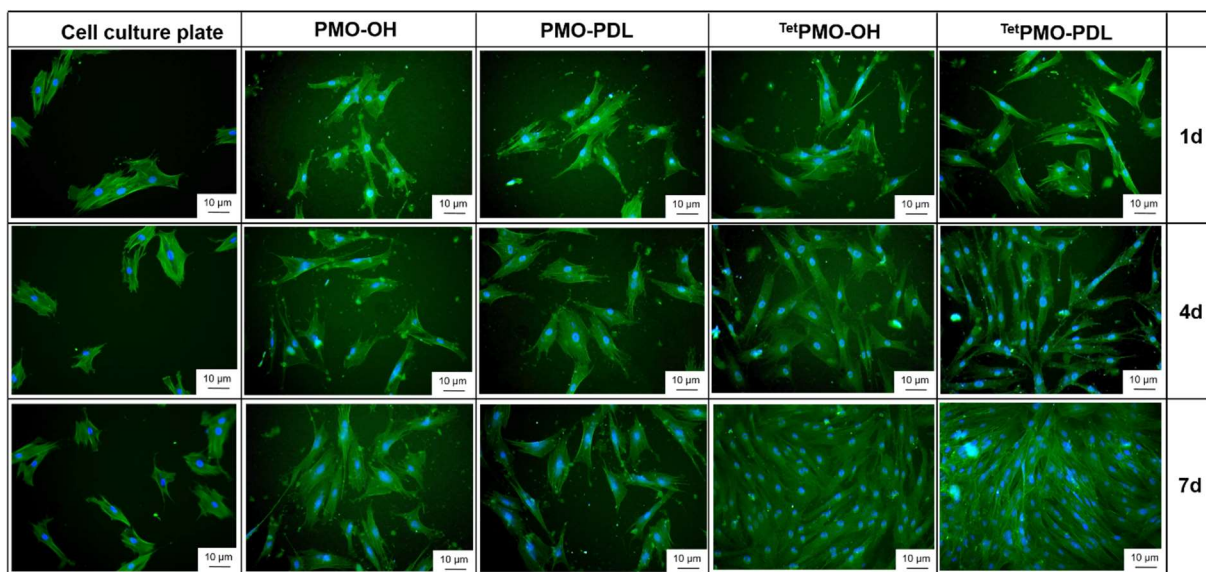

**Figure S2.** Fluorescence microscopy images (20x magnification) of fibroblast cells in 0.3 mg/ml PMO after 1 day, 4 days and 7 days (Blue: DAPI-stained cell nuclei. Green: Phalloidin-stained cell actin filaments).

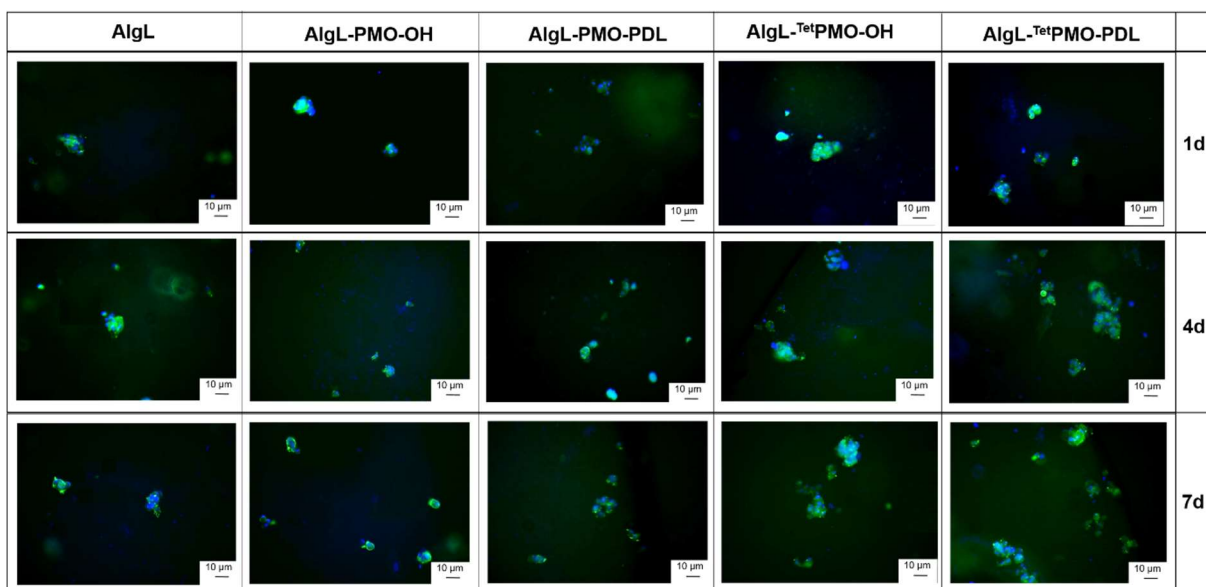

**Figure S3.** Fluorescence microscopy images (20x magnification) of fibroblast cells in scaffolds after 1 day, 4 days and 7 days (the red line shows the scale bar of ~10 μm) (Blue: DAPI-stained cell nuclei. Green: Phalloidin-stained cell actin filaments).
